# Supplementary material
Source: ML conference proceedings conference paper supplement (https://proceedings.neurips.cc/paper_files/paper/2019/hash/6d9c547cf146054a5a720606a7694467-Abstract.html)
Supplement: Supplementary file [file 6d9c547cf146054a5a720606a7694467-Supplemental.zip]

# Supplementary Material for “Gradient Information for Representation and Modeling”

## 350 **Supplementary Material**

351 In the supplement, we include proofs of theoretical results, and provide three additional applications  
352 of gradient information. One application is on Granger-type causality measures; The second appli-  
353 cation is about channel stability in information theory; The last application is in derivation of some  
354 general inequalities using gradient information (which are otherwise highly nontrivial to establish).

## 355 **Proof of Theorem 11**

356 It can be seen that  $D_{\nabla}(p, q) = 0$  if and only if  $\nabla p(y) = \nabla q(y)$  almost everywhere. Since  $p$  and  $q$   
357 are densities and integrate to one,  $\nabla p(y) = \nabla q(y)$  is equivalent to  $p(y) = q(y)$  almost everywhere.

358 Using direct calculation and integration by parts, we have

$$\begin{aligned} D_{\nabla}(p, q) &= \frac{1}{2} \int_{[a, b]} p(y) |(\nabla \log q(y)) \circ (y - a)^{\alpha_j} \circ (y - b)^{\beta_j}|^2 dx \\ &\quad - \sum_{j=1}^d \int_{[a_j, b_j]} p(y) (\partial_{y_j} \log p(y)) (\partial_{y_j} \log q(y)) (y_j - a_j)^{2\alpha_j} (y_j - b_j)^{2\beta_j} dy_j + C \end{aligned}$$

359 and the  $j$ -th term in the above summation is

$$\begin{aligned} & - \int_{[a_j, b_j]} p(y) (\partial_{y_j} \log p(y)) (\partial_{y_j} \log q(y)) (y_j - a_j)^{2\alpha_j} (y_j - b_j)^{2\beta_j} dy_j \\ &= - \int_{[a_j, b_j]} (\partial_{y_j} p(y)) (\partial_{y_j} \log q(y)) (y_j - a_j)^{2\alpha_j} (y_j - b_j)^{2\beta_j} dy_j \\ &= -p(y) (\partial_{y_j} \log q(y)) (y_j - a_j)^{2\alpha_j} (y_j - b_j)^{2\beta_j} \Big|_{a_j}^{b_j} + \int_{[a_j, b_j]} p(y) \partial_{y_j} \left\{ (\partial_{y_j} \log q(y)) (y_j - a_j)^{2\alpha_j} (y_j - b_j)^{2\beta_j} \right\} dy_j \\ &= \int_{[a_j, b_j]} p(y) \partial_{y_j} \left\{ (\partial_{y_j} \log q(y)) (y_j - a_j)^{2\alpha_j} (y_j - b_j)^{2\beta_j} \right\} dy_j \end{aligned}$$

360 where the last identity holds under (B).

## 361 **Proof of Theorem 2**

362 We use  $\nabla_{y,z}$  and  $\nabla_y$  to highlight that the derivative is taken with regard to  $[y, z]$  and  $y$ , respectively.  
363 We only prove for unbounded  $Y, Z$ . The proof of the extended case is similar, as discussed in  
364 Subsection 2.2.

365 We first prove Identity (6). Applying Proposition 11 and Identity (5), we obtain the following identi-  
366 ties (where expectations are with respect to  $p_{YZ}$ ):

$$\begin{aligned} D_{\nabla}(p_{YZ}, p_Y p_Z) &= \mathbb{E}\{s_{\nabla}([Y, Z], p_Y p_Z)\} + \frac{1}{2} \mathbb{E}\|\nabla_{y,z} \log p_{Y,Z}(Y, Z)\|^2 \\ &= \frac{1}{2} \mathbb{E}\left(\|\nabla_y \log\{p_Y(Y) p_Z(Z)\}\|^2 + \|\nabla_z \log\{p_Y(Y) p_Z(Z)\}\|^2\right) \\ &\quad + \Delta_y \log\{p_Y(Y) p_Z(Z)\} + \Delta_z \log\{p_Y(Y) p_Z(Z)\} - \mathbb{E}\{s_{\nabla}([Y, Z], p_Y p_Z)\} \\ &= \mathbb{E}\{s_{\nabla}(Y, p_Y)\} + \mathbb{E}\{s_{\nabla}(Z, p_Z)\} - \mathbb{E}\{s_{\nabla}([Y, Z], p_Y p_Z)\}. \end{aligned}$$

367 We then prove Identity (9). Direct calculations give

$$\begin{aligned}\mathbb{E}\{s_{\nabla}([Y, Z], p_{Y,Z})\} &= \frac{1}{2}\mathbb{E}\|\nabla_{y,z}\{\log p_Y(Y) + \log p_{Z|Y}(Z | Y)\}\|^2 + \mathbb{E}(\Delta_{y,z}\{\log p_Y(Y) + \log p_{Z|Y}(Z | Y)\}) \\ &= \frac{1}{2}\mathbb{E}(\|\nabla_y \log p_Y(Y)\|^2 \\ &\quad + \|\nabla_{y,z} \log p_{Z|Y}(Z | Y)\|^2) + \mathbb{E}\{\Delta_y \log p_Y(Y)\} + \mathbb{E}\{\Delta_{y,z} \log p_{Z|Y}(Z | Y)\} + c \\ &= H_{\nabla}(Y) + H_{\nabla}(Z | Y) + c\end{aligned}$$

368 where  $c$  denotes

$$c = \mathbb{E}\{\nabla_y \log p_Y(Y)^{\top} \cdot \nabla_y \log p_{Z|Y}(Z | Y)\}.$$

369 It remains to show that  $c = 0$ . We use  $d_y$ ,  $\mathcal{D}_y$ ,  $\mathcal{D}_{y(-j)}$  to denote the dimension of  $Y$ , domain of  
370  $Y$ , domain of the subvector of  $Y$  excluding dimension  $j$ , respectively.  $\mathcal{D}_z$  and  $\mathcal{D}_{y,z}$  are similarly  
371 defined. We have

$$\begin{aligned}c &= \mathbb{E}\{\nabla_y \log p_Y(Y)^{\top} \cdot \nabla_y \log p_{Z|Y}(Z | Y)\} \\ &= \sum_{j=1}^{d_y} \int_{\mathcal{D}_{y,z}} p_{Y,Z}(y, z) \frac{\partial_{y_j} p_Y(y)}{p_Y(y)} \cdot \frac{\partial_{y_j} p_{Z|Y}(z | y)}{p(z | y)} dy dz \\ &= \sum_{j=1}^{d_y} \int_{\mathcal{D}_{y,z}} \partial_{y_j} p_Y(y) \cdot \partial_{y_j} p(z | y) dy dz \\ &= \sum_{j=1}^{d_y} \int_{\mathcal{D}_{y(-j),z}} \left( p_Y(y) \cdot \partial_{y_j} p(z | y) \Big|_{-\infty}^{\infty} - \int_{\mathcal{D}_j} p_Y(y) \partial_{y_j}^2 p(z | y) dy_j \right) \prod_{k \neq j} dy_k dz \\ &= - \int_{\mathcal{D}_y} p_Y(y) \left( \int_{\mathcal{D}_z} \Delta_y p(z | y) dz \right) dy = - \int_{\mathcal{D}_y} p_Y(y) \left( \Delta_y \int_{\mathcal{D}_z} p(z | y) dz \right) dy = 0.\end{aligned}$$

### 372 Proof of Proposition 2

373 We first prove (9). By a derivation similar to the proof of Theorem 2, we obtain

$$H_{\nabla}(Z | Y) = -\frac{1}{2}\mathbb{E}\|\nabla_{[z,y]} \log p(z | y)\|^2 \quad (13)$$

374 for any two random variables  $Z, Y$  whose joint distribution exists. Therefore,

$$H_{\nabla}(Z | Y) = -\frac{1}{2}\mathbb{E}\|\nabla_{Y,Z} \log p_{Z|Y}(Z | Y)\|^2 \leq -\frac{1}{2}\mathbb{E}\|\nabla_Z \log p_{Z|Y}(Z | Y)\|^2 = \mathbb{E}\{H_{\nabla}(Z | Y = y)\}.$$

375 We then prove (10). Suppose  $W = Y + Z$ . It follows from (13) that

$$\begin{aligned}H_{\nabla}(W | Z) &= -2 \times \frac{1}{2}\mathbb{E}\|\nabla_w \log p(w - z)\|^2 \\ &= -\mathbb{E}\|\nabla_y \log p(y)\|^2 = 2H_{\nabla}(Y).\end{aligned}$$

### 376 Proof of Proposition 3

377 **Lemma 1.** *Given a fixed covariance matrix  $V$  of a random variable  $Y$  supported on  $\mathbb{R}^d$ , the  
378 distribution that maximizes  $H_{\nabla}(Y)$  is Gaussian (with an arbitrary mean), and the maximum is  
379  $-\text{Tr}(V^{-1})/2$ .*

380 We now prove that the maximum entropy distribution on  $\mathbb{R}^d$  is Gaussian given second moment  
381 constraints. The results are readily observable from the known results that the distribution with a  
382 fixed variance that minimizes the Fisher information is the Gaussian distribution, typically proved  
383 using calculus of variations and differential equations (see, e.g. [28]). Here we provide a much  
384 simpler proof.

385 *Proof.* Suppose that  $Y_1, Y_2$  are two i.i.d. random variables following the maximum entropy distri-  
 386 bution. Then  $2Y_1$  follows the maximum entropy distribution with variance  $2V$ , and by definition,  
 387  $J(2Y_1) \leq J(Y_1 + Y_2)$ . Direction calculations show that  $J(2Y_1) = J(Y_1)/2$ , therefore, it follows  
 388 from the convolution inequality [29] that

$$\frac{J(Y_1)}{2} = J(2Y_1) \leq J(Y_1 + Y_2) \leq \frac{1}{J(Y_1)^{-1} + J(Y_2)^{-1}} = \frac{J(Y_1)}{2}$$

389 with equality only if the equality for convolution inequality for Fisher information holds, which  
 390 implies that  $Y_1, Y_2$  must be Gaussian.  $\square$

391 *Proof of Proposition 3:*

392 By Lemma 11, we have

$$\mathbb{E}(Y - \hat{Y}(X))^2 = \mathbb{E}_X \mathbb{E}_{Y|X}(Y - \hat{Y}(x) | X = x)^2 \geq \mathbb{E}_X \text{Var}(Y | X = x) \geq \mathbb{E}_X \frac{1}{-2H_{\nabla}(Y | X = x)}.$$

393 Moreover, applying Cauchy's inequality and Identity 9, we obtain

$$\mathbb{E}_X \frac{1}{-2H_{\nabla}(Y | X = x)} \geq \frac{1}{\mathbb{E}_X \{-2H_{\nabla}(Y | X = x)\}} \geq \frac{1}{-2H_{\nabla}(Y | X)}.$$

394 This concludes the proof.

### 395 **Proof of Theorem 3**

396 Let  $p^a$  denote a distribution with first-order dependence tree structure. Using Proposition 11 and  
 397 Identity 8, we have

$$\mathbb{E}\{D_{\nabla}(p, p^a)\} = \mathbb{E}\{s_{\nabla}(Y, p^a)\} + \frac{1}{2} \mathbb{E}\|\nabla_y \log p(y)\|^2 = \mathbb{E}\{s_{\nabla}(Y, p^a)\} - H_{\nabla}(Y) \quad (14)$$

398 In order to minimize  $\mathbb{E}\{D_{\nabla}(p, p^a)\}$ , we only need to minimize  $\mathbb{E}\{s_{\nabla}(Y, p^a)\}$ . Let  $j(i)$  index the  
 399 parent node of  $i$  on the tree that represents  $p^a$ . Without loss of generality, let  $Y_1$  denote the root of  
 400 the tree, and  $E_a$  denote the set of edges. By Identity (10) in Theorem 2, the Markovity of  $p^a$ , and  
 401 the fact that  $p^a(\cdot)$  agrees with  $p(\cdot)$  on all the first and second order marginal distributions, we can  
 402 rewrite  $\mathbb{E}\{s_{\nabla}(Y, p^a)\}$  as

$$\begin{aligned} \mathbb{E}\{s_{\nabla}(Y, p^a)\} &= \mathbb{E}\{s_{\nabla}(Y_1, p_1^a)\} + \sum_{\{i, j(i)\} \in E_a} \mathbb{E}\{s_{\nabla}(Y_i, p_{i|j(i)}^a)\} \\ &= H_{\nabla}(Y_1) + \sum_{\{i, j(i)\} \in E_a} \{H_{\nabla}(Y_i) - I_{\nabla}(Y_i; Y_{j(i)})\} \\ &= \sum_{i=1}^n H_{\nabla}(Y_i) - \sum_{\{i, j(i)\} \in E_a} I_{\nabla}(Y_i; Y_{j(i)}). \end{aligned}$$

403 This concludes the proof.

### 404 **Derivations for exponential family example**

405 The sample average of (11) is a quadratic function of  $\theta = [\theta_1, \dots, \theta_5]$ . The closed form solution  $\hat{\theta}$  is  
 406 derived as

$$\hat{\theta} = - \left\{ \sum_{j=1}^n (a_{1,j} a_{1,j}^T + a_{2,j} a_{2,j}^T) \right\}^{-1} \sum_{j=1}^n (a_{3,j} + a_{4,j}) \quad (15)$$

407 where

$$\begin{aligned} a_{1,j} &= [2y_{1,i} y_{2,i}^2, 2y_{1,i}, 0, y_{2,i}, 1, 0]^T, & a_{2,j} &= [2y_{1,i}^2 y_{2,i}, 0, 2y_{2,i}, y_{1,i}, 0, 1]^T, \\ a_{3,j} &= [2y_{2,i}^2, 2, 0, 0, 0, 0]^T, & a_{4,j} &= [2y_{1,i}^2, 0, 2, 0, 0, 0]^T, \end{aligned}$$

408 The distribution density of  $Y_2$  is

$$p(y_2) \propto (-\theta_1 y_2^2 - \theta_2)^{-1/2} \exp \left\{ -\frac{(\theta_4 y_2 + \theta_5)^2}{4(\theta_1 y_2^2 + \theta_2)} + \theta_3 y_2^2 + \theta_6 y_2 \right\} \quad (16)$$

409 So its entropy can be estimated by

$$\begin{aligned} & -\frac{1}{2n} \sum_{j=1}^n \|\nabla \log p_{\hat{\theta}}(y_2)\|^2 \\ &= -\frac{1}{2n} \sum_{j=1}^n \left\{ -\frac{1}{2} \frac{2\hat{\theta}_1 y_{2,j}}{\hat{\theta}_1 y_{2,j}^2 + \hat{\theta}_2} + \frac{1}{4} \frac{2\hat{\theta}_1 y_{2,j}(\hat{\theta}_4 y_{2,j} + \hat{\theta}_5)^2}{(\hat{\theta}_1 y_{2,j}^2 + \hat{\theta}_2)^2} - \frac{1}{4} \frac{2\hat{\theta}_4(\hat{\theta}_4 y_{2,j} + \hat{\theta}_5)}{\hat{\theta}_1 y_{2,j}^2 + \hat{\theta}_2} + 2\hat{\theta}_3 y_{2,j} + \hat{\theta}_6 \right\}^2. \end{aligned}$$

410 The value of  $H_{\nabla}(Y_1)$  can be similarly estimated. We therefore get an consistent (under some mo-  
411 ment conditions) estimate  $I_{\nabla}(Y_1, Y_2)$  from Proposition 6.

412 The conditional distribution density  $p(y_1 | y_2)$  can be calculated from (12) and (16):

$$p(y_1 | y_2) \propto (-\theta_1 y_2^2 - \theta_2)^{1/2} \exp \left\{ \theta_1 y_1^2 y_2^2 + \theta_2 y_1^2 + \theta_4 y_1 y_2 + \theta_5 y_1 + \frac{(\theta_4 y_2 + \theta_5)^2}{4(\theta_1 y_2^2 + \theta_2)} \right\} \quad (17)$$

### 413 Application: Implication on Causality

414 The identification of causality usually serves as a key step towards simplified modeling and learning.  
415 Let  $X_1, X_2, \dots$  and  $Y_1, Y_2, \dots$  be two sequences of data. In general, we say a series  $X_t$  causes  
416 another series  $Y_t$  if knowing the past  $\{X_1, \dots, X_{t-1}\}$  can provide information on the future of  $Y_t$   
417 given the past of  $\{Y_1, \dots, Y_{t-1}\}$ . This school of thoughts is exemplified by the seminal work of  
418 Granger [30] in identifying causal relations between multivariate times series. The Granger causal-  
419 ity is typically tested in linear models between  $Y_t$  and  $X_t$  (with lags) and the two processes are  
420 assumed to be stationary [31]. In general, this type of of causality can be unified by Kolmogorov  
421 complexity  $\mathbb{K}(\cdot)$  which, not only extends Granger causality to nonstationary and nonlinear processes,  
422 but also includes various other approximations of Kolmogorov information in the literature, such as  
423 Shannon's mutual information, Renyi's information, directed Shannon information, directed Renyi  
424 information, combinatorial measures of information (e.g. Lempel-Ziv information).

425 Intuitively, the quantity measures how much complexity of the series  $\{Y_t\}$  is re-  
426 duced by knowing  $\{X_t\}$ . The past  $\{X_1, \dots, X_{t-1}\}$  provide information about  $Y_t$  if  
427  $\mathbb{K}(Y_t | X_{t-1}, \dots, X_1, Y_{t-1}, \dots, Y_1) < \mathbb{K}(Y_t | Y_{t-1}, \dots, Y_1)$  for Kolmogorov complexity measure  
428  $\mathbb{K}(\cdot)$ . In this case, additional predictive information is provided by the series  $\{X_t\}$  if

$$\mathbb{K}(Y_t | Y_{t-1}, \dots, Y_1) - \mathbb{K}(Y_t | Y_{t-1}, \dots, Y_1, X_{t-1}, \dots, X_1)$$

429 is greater than zero. We define the left hand side of the above term to be the Kolmogorov causal  
430 information provided by series  $\{X_t\}$  for predicting  $\{Y_t\}$ .

431 However, Kolmogorov information is in general not computable and its surrogates may be used in-  
432 stead. For example, consider replacing the complexity measure  $\mathbb{K}$  by Shannon entropy  $H(Y) =$   
433  $-\int p(y) \log p(y) dy$  for a continuous random variable  $Y$ . In this case, Kolmogorov causal informa-  
434 tion reduces to the directed Shannon information [32].

Using gradient entropy as the surrogate for the Kolmogorov information, we can define gradient-  
directed information (as a surrogate for Kolmogorov causal information) as:

$$H_{\nabla}(Y_t | Y_{t-1}, \dots, Y_1) - H_{\nabla}(Y_t | Y_{t-1}, \dots, Y_1, X_{t-1}, \dots, X_1).$$

435 The above measure provides an alternative method of measuring the causality from the sensitiv-  
436 ity point of view. It also provides significant computational advantages particularly when density  
437 normalizing constants are unknown.

### 438 Application: Stability of Channel Capacity

439 Consider input  $X$ , output  $Y$ , and a time invariant channel described by conditional distribution  
440  $p_{Y|X}$ . The channel capacity in many cases is achieved by maximizing  $I(X; Y)$  over the marginal

distribution of  $X$ ,  $p_X$  (see for example the channel coding theorem [53]). In practical applications, we may also be interested in the stability of channel capacity, in the sense that the capacity is not very sensitive to perturbations at both ends of the channel. One possible way to define the channel stability is through the definition of  $I_{\nabla}(X; Y)$  which can be interpreted as the sensitivity of  $I(X; Y)$ : the smaller the better (see Subsection 2.4).

It is thus reasonable to assume that solutions of the following types of optimization problem would lead to channel coding that is both efficient in transmitting signals and robust against noise.

$$\max_{p_X} I(X; Y) / I_{\nabla}(X; Y). \quad (18)$$

It has been well known that Gaussian input maximizes the Gaussian channel capacity under power constraints. In the following theorem, we show that Gaussian input also minimizes  $I_{\nabla}(X; Y)$  for Gaussian channels under power constraints. The result further indicates that Gaussian input achieves the optimum of (18), i.e. it enjoys *not only the largest information capacity but also the smallest instability*.

**Theorem 4.** *For Gaussian channel  $Y = X + N$  where  $N \sim \mathcal{N}(0, v_N)$  and  $\text{var}(X) = v_X$ , the  $p_X$  that achieves the minimum of  $I_{\nabla}(X; Y)$  is Gaussian.*

$$\min_{p_X} I_{\nabla}(X; Y). \quad (19)$$

Moreover, the smallest mutual information is

$$I_{\nabla}(X; Y) = H_{\nabla}(Y) - H_{\nabla}(Y | X) = -\frac{1}{2(v_X + v_N)} + \frac{1}{v_N} = \frac{2v_X + v_N}{2(v_X + v_N)v_N},$$

which is increasing in  $v_X$  with range  $[v_N^{-1}, 2v_N^{-1})$ .

*Proof.* By Identity (14) in Theorem 2, we have  $I_{\nabla}(X; Y) = H_{\nabla}(Y) - H_{\nabla}(Y | X)$ . Using Identity (14), we have

$$H_{\nabla}(Y | X) = H_{\nabla}(X + N | X) = 2H_{\nabla}(N) = -\frac{1}{v_N}$$

which is a constant that does not depend on  $X$ . Thus, minimizing (19) is equivalent to minimizing  $H_{\nabla}(Y)$  under the constraint that  $\text{Var}(Y) \leq v_N + v_X$ . Using Lemma 1 concludes the proof.  $\square$

## Application: Some Elementary Inequalities

**Proposition 5.** *Under the same assumptions of Theorem 2, we have*

$$H_{\nabla}(Y_1, \dots, Y_n) = \sum_{i=1}^n H_{\nabla}(Y_i | Y_1, \dots, Y_{i-1}) \leq \sum_{i=1}^n H_{\nabla}(Y_i). \quad (20)$$

*Proof.* The result can be obtained by recursively applying Identity (14) in Theorem 2 for  $n$  random variables  $Y_1, \dots, Y_n$ .  $\square$

We can generalize Proposition 5 to show how the monotonicity of the average entropy rates of subsets as the size of the subsets increases.

**Proposition 6.** *Suppose that  $Y_1, \dots, Y_n$  have a joint distribution. For every  $S \subseteq \{1, \dots, n\}$ , let  $Y_S = \{Y_i : i \in S\}$ , and  $Y_{S^c} = \{Y_i : i \notin S\}$ . Let*

$$h_k^{(n)} = \frac{1}{\binom{n}{k}} \sum_{S: \text{card}(S)=k} \frac{H_{\nabla}(Y_S)}{k}, \quad (21)$$

$$t_k^{(n)} = \frac{1}{\binom{n}{k}} \sum_{S: \text{card}(S)=k} \frac{1}{-H_{\nabla}(Y_S)/k}, \quad (22)$$

Then

$$\begin{aligned} h_1^{(n)} &\geq \dots \geq h_n^{(n)} \\ t_1^{(n)} &\geq \dots \geq t_n^{(n)} \end{aligned}$$

467 *Proof.* Inequalities (21) can be proved using the same arguments as in the proof of Theorem 16.8.1  
 468 in [33] (which only uses Proposition 8). We only prove the Inequality (22) here. The proof of  
 469 Theorem 16.8.1 in [33] implies that

$$\frac{1}{n} \sum_{i=1}^n \frac{H_{\nabla}(Y_{-i})}{n-1} \geq \frac{1}{n} H_{\nabla}(Y_1, \dots, Y_n) \quad (23)$$

470 where  $Y_{-i}$  denotes  $[Y_1, \dots, Y_{i-1}, Y_{i+1}, Y_n]$ . Thus, we have

$$\frac{1}{n} \sum_{i=1}^n \frac{1}{\frac{-H_{\nabla}(Y_{-i})}{n-1}} \geq \frac{1}{\frac{1}{n} \sum_{i=1}^n \frac{-H_{\nabla}(Y_{-i})}{n-1}} \geq \frac{1}{-\frac{1}{n} H_{\nabla}(Y_1, \dots, Y_n)} \quad (24)$$

471 where the first inequality of (24) follows from the fact that  $H_{\nabla}(\cdot)$  is a negative function and the  
 472 harmonic mean is no larger than the arithmetic mean, and the second inequality follows from (23).  
 473 Inequality (24) is equivalent to  $t_{n-1}^{(n)} \geq t_n^{(n)}$ . To prove (22), we first condition on a  $k$ -element subset,  
 474 and apply the existing result to obtain  $t_{k-1}^{(k)} \geq t_n^{(k)}$ . We then take a uniform choice over the  $k$ -element  
 475 subset and its  $k-1$ -element subsets.  $\square$

Consider the specific case where  $Y_i$ 's are jointly distributed according to Gaussian distribution with covariance  $V$ . We can have inequalities for traces, as Gaussian gradient entropy is

$$-\frac{1}{2} \text{Tr}(V^{-1}).$$

476 Throughout the remainder of this chapter, we will assume that  $V$  is a positive definite symmetric  
 477  $n \times n$  matrix.

478 **Proposition 7.** *For any positive definite matrix  $V$ , we have*

$$\text{Tr}(V^{-1}) \geq \sum_{i=1}^n \text{Tr}(V_i^{-1}). \quad (25)$$

479 *for any set of block matrices  $\{V_1, \dots, V_n\}$  of  $V$  whose rows (resp. columns) form a partition of the*  
 480 *rows (resp. columns) of  $V$ . Moreover, the equality holds if and only if  $V$  are block-diagonal with*  
 481 *blocks  $\{V_1, \dots, V_n\}$ .*

482 Inequality (25) immediately follows from (21). We note that the inequality in (25) can also be  
 483 proved by using block matrix inversion and Woodbury matrix identity, but it is much more involved  
 484 compared with the simple proof here using entropy inequality.

485 **Proposition 8.** *If  $h_k$  denotes the product of the determinants of all the principal  $k$ -rowed minors of*  
 486 *a positive definite  $n \times n$  matrix  $V$ , i.e.,*

$$h_k = \sum_{1 \leq i_1 < \dots < i_k \leq n} \text{Tr}(V(i_1, \dots, i_k)^{-1})$$

487 *then*

$$h_1 \leq \dots \leq \frac{h_k}{\binom{n-1}{k-1}} \leq \dots \leq h_n$$

488 *with equality if and only if  $V$  is a diagonal matrix.*

489 *Proof.* Let  $X \sim \mathcal{N}(0, V)$ . Then the inequality follows directly from Proposition 8 and  $k \binom{n}{k} =$   
 490  $n \binom{n-1}{k-1}$ . The proof of Inequality (21) implies that if  $X$  is Gaussian, the equality holds if and only if  
 491 the entries of  $X$  are independent, i.e.,  $V$  is diagonal.  $\square$

## References

- [1] M. Parry, A. P. Dawid, and S. Lauritzen, “Proper local scoring rules,” *Ann. Stat.*, pp. 561–592, 2012.
- [2] J. Ding, V. Tarokh, and Y. Yang, “Bridging AIC and BIC: a new criterion for autoregression,” *IEEE Trans. Inf. Theory*, 2017.
- [3] —, “Model selection techniques—an overview,” *IEEE Signal Process. Mag.*, vol. 35, no. 6, pp. 16–34, 2018.
- [4] D. M. Blei, A. Kucukelbir, and J. D. McAuliffe, “Variational inference: A review for statisticians,” *J. Am. Stat. Assoc.*, vol. 112, no. 518, pp. 859–877, 2017.
- [5] M. A. Carreira-Perpinan and G. E. Hinton, “On contrastive divergence learning,” in *Aistats*, vol. 10. Citeseer, 2005, pp. 33–40.
- [6] H. Peng, F. Long, and C. Ding, “Feature selection based on mutual information criteria of max-dependency, max-relevance, and min-redundancy,” *IEEE Trans. Pattern Anal. Mach. Intell.*, vol. 27, no. 8, pp. 1226–1238, 2005.
- [7] A. S. Ribeiro, S. A. Kauffman, J. Lloyd-Price, B. Samuelsson, and J. E. Socolar, “Mutual information in random boolean models of regulatory networks,” *Physical Review E*, vol. 77, no. 1, p. 011901, 2008.
- [8] J. R. Quinlan, “Induction of decision trees,” *Machine learning*, vol. 1, no. 1, pp. 81–106, 1986.
- [9] A. Hyvärinen, “Estimation of non-normalized statistical models by score matching,” *J. Mach. Learn. Res.*, vol. 6, no. Apr, pp. 695–709, 2005.
- [10] A. P. Dawid, M. Musio *et al.*, “Bayesian model selection based on proper scoring rules,” *Bayesian Anal.*, vol. 10, no. 2, pp. 479–499, 2015.
- [11] S. Shao, P. E. Jacob, J. Ding, and V. Tarokh, “Bayesian model comparison with the Hyvarinen score: computation and consistency,” *J. Am. Stat. Assoc.*, 2018.
- [12] C. Holmes and S. Walker, “Assigning a value to a power likelihood in a general bayesian model,” *Biometrika*, vol. 104, no. 2, pp. 497–503, 2017.
- [13] A. D. Hendrickson and R. J. Buehler, “Proper scores for probability forecasters,” *Ann. Math. Stat.*, pp. 1916–1921, 1971.
- [14] A. P. Dawid, S. Lauritzen, M. Parry *et al.*, “Proper local scoring rules on discrete sample spaces,” *Ann. Stat.*, vol. 40, no. 1, pp. 593–608, 2012.
- [15] A. Hyvärinen, “Some extensions of score matching,” *Computational statistics & data analysis*, vol. 51, no. 5, pp. 2499–2512, 2007.
- [16] B. R. Frieden, “Fisher information, disorder, and the equilibrium distributions of physics,” *Physical Review A*, vol. 41, no. 8, p. 4265, 1990.
- [17] S. Lyu, “Interpretation and generalization of score matching,” in *Proceedings of the Twenty-Fifth Conference on Uncertainty in Artificial Intelligence*. AUAI Press, 2009, pp. 359–366.
- [18] C. Chow and C. Liu, “Approximating discrete probability distributions with dependence trees,” *IEEE Trans. Inf. Theory*, vol. 14, no. 3, pp. 462–467, 1968.
- [19] J. B. Kruskal, “On the shortest spanning subtree of a graph and the traveling salesman problem,” *Proc. Am. Math. Soc.*, vol. 7, no. 1, pp. 48–50, 1956.
- [20] K. Sachs, O. Perez, D. Pe’er, D. A. Lauffenburger, and G. P. Nolan, “Causal protein-signaling networks derived from multiparameter single-cell data,” *Science*, vol. 308, no. 5721, pp. 523–529, 2005.
- [21] M. Yu, M. Kolar, and V. Gupta, “Statistical inference for pairwise graphical models using score matching,” in *Advances in Neural Information Processing Systems*, 2016, pp. 2829–2837.
- [22] J. H. Friedman and L. C. Rafsky, “Multivariate generalizations of the wald-wolfowitz and smirnov two-sample tests,” *Ann. Stat.*, pp. 697–717, 1979.
- [23] L. Breiman, “Random forests,” *Machine learning*, vol. 45, no. 1, pp. 5–32, 2001.
- [24] H. Zou and T. Hastie, “Regularization and variable selection via the elastic net,” *J. Roy. Statist. Soc. Ser. B*, vol. 67, no. 2, pp. 301–320, 2005.

- 333 [25] A. Decelle, F. Krzakala, C. Moore, and L. Zdeborová, “Asymptotic analysis of the stochastic  
334 block model for modular networks and its algorithmic applications,” *Physical Review E*,  
335 vol. 84, no. 6, p. 066106, 2011.
- 336 [26] J. D. Hamilton and M. T. Owyang, “The propagation of regional recessions,” *Rev. Econ. Stat.*,  
337 vol. 94, no. 4, pp. 935–947, 2012.
- 338 [27] C. T. Brownlees, G. Gudmundsson, and G. Lugosi, “Community detection in partial correlation  
339 network models,” 2017.
- 340 [28] J.-F. Bercher and C. Vignat, “On minimum fisher information distributions with restricted sup-  
341 port and fixed variance,” *Information Sciences*, vol. 179, no. 22, pp. 3832–3842, 2009.
- 342 [29] N. Blachman, “The convolution inequality for entropy powers,” *IEEE Trans. Inf. Theory*,  
343 vol. 11, no. 2, pp. 267–271, 1965.
- 344 [30] C. W. Granger, “Investigating causal relations by econometric models and cross-spectral meth-  
345 ods,” *Econometrica*, pp. 424–438, 1969.
- 346 [31] —, “Some recent development in a concept of causality,” *Journal of Econometrics*, vol. 39,  
347 pp. 199–211, 1988.
- 348 [32] J. Massey, “Causality, feedback and directed information,” in *Proc. Int. Symp. Inf. Theory*  
349 *Applic. (ISITA-90)*. Citeseer, 1990, pp. 303–305.
- 350 [33] T. M. Cover and J. A. Thomas, *Elements of information theory*. John Wiley & Sons, 2012.
